# Supplementary material for: Temperature-sensitive migration dynamics in neutrophil-differentiated HL-60 cells
Source: PubMed Central journal article supplement (PMC9054779; doi:10.1038/s41598-022-10858-w), 2022-04-29
Supplement: 41598_2022_10858_MOESM2_ESM.pdf [file 41598_2022_10858_MOESM2_ESM.pdf]

## Supplementary data

### Temperature-sensitive migration dynamics in neutrophil-differentiated HL-60 cells

Galina Khachaturyan<sup>1,2</sup>, Andrew W. Holle<sup>1,3,4</sup>, Karen Ende<sup>5</sup>, Christoph Frey<sup>1,2</sup>, Heiko A. Schwederski<sup>5</sup>, Tim Eiseler<sup>6</sup>, Stephan Paschke<sup>7</sup>, Alexandre Micoulet<sup>1,2</sup>, Joachim P. Spatz<sup>1,2</sup>, Ralf Kemkemer<sup>1,5</sup>\*

<sup>1</sup> Department of Cellular Biophysics, Max Planck Institute for Medical Research, 69120 Heidelberg, Germany

<sup>2</sup> Department of Biophysical Chemistry, University of Heidelberg, 69120 Heidelberg, Germany

<sup>3</sup> Mechanobiology Institute, National University of Singapore, 117411 Singapore, Republic of Singapore

<sup>4</sup> Department of Biomedical Engineering, National University of Singapore, 117411 Singapore, Republic of Singapore

<sup>5</sup> School of Applied Chemistry, Reutlingen University, 72762 Reutlingen, Germany

<sup>6</sup> Internal Medicine I, University Clinic Ulm, 89081 Ulm, Germany

<sup>7</sup> General and Visceral Surgery, University Clinic Ulm, 89081 Ulm, Germany

\*Corresponding author. Alteburgstrasse 150, 72762, Reutlingen, Germany. Tel: +49 7121 271-2070; E-mail address: ralf.kemkemer@reutlingen-university.de

**Supplemental Video: Cell detachment during temperature sweep.** HL-60 cells plated on glass exposed to a temperature sweep from 37-43 °C before rapid return to 37 °C. Images were obtained every 10 seconds for nearly 2.5 hours.

Supplemental Figure 1

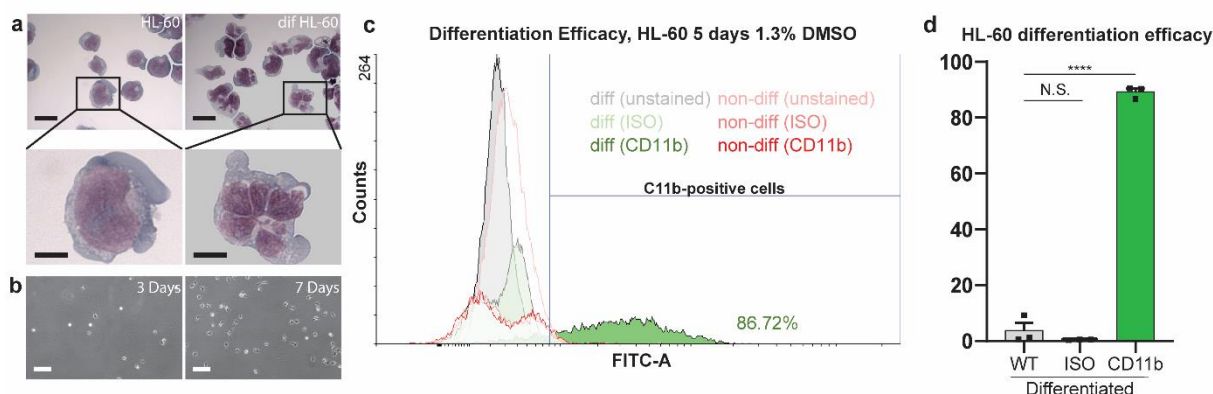

**Supplemental Figure 1: Successful differentiation of HL-60 cells into neutrophil-like cells. a.** Giemsa-Wright staining of HL-60 cells before (left) and 7 days after differentiation (right). Scale bars: 50  $\mu$ m (top) and 20  $\mu$ m (bottom). The majority of differentiated HL-60 cells exhibit lobed nuclei characteristic to blood PMN cells. **b.** 10x phase contrast images 3 days and 7 days after the start of differentiation. The amount of attached cells increases up to 10 fold. Scale bars: 50  $\mu$ m. **c.** Flow cytometry of differentiated HL-60 cells after 5 days of 1.3% DMSO treatment. **d.** Differentiation efficiency of HL-60 cells as measured by CD11b expression.

Supplemental Figure 2

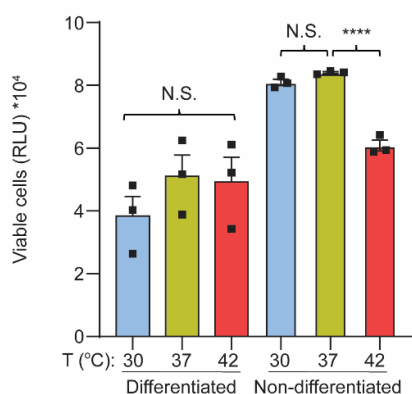

**Supplemental Figure 2: HL-60 cell survival as a function of temperature.** ATP-based cell viability determined with CellTiter-Glo assay to assess the relative level of viable cells at 30, 37, and 42 °C.

Supplemental Figure 3

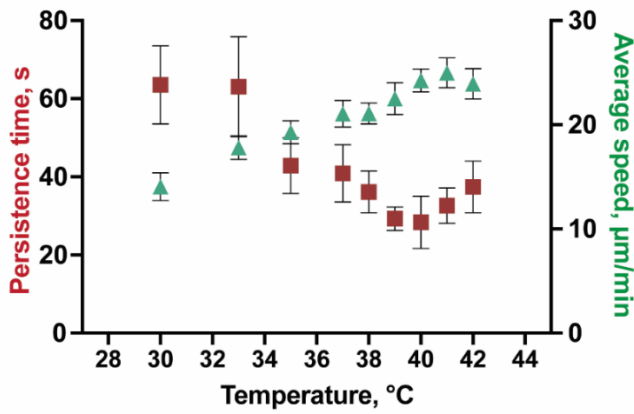

**Supplemental Figure 3: Relationship between average cell speed and migration persistence time for differentiated HL-60 cells at control conditions.** With increasing temperature cell average speed increases (right axis, green), but migration persistence time decreases (left axis, red).

Supplemental Figure 4

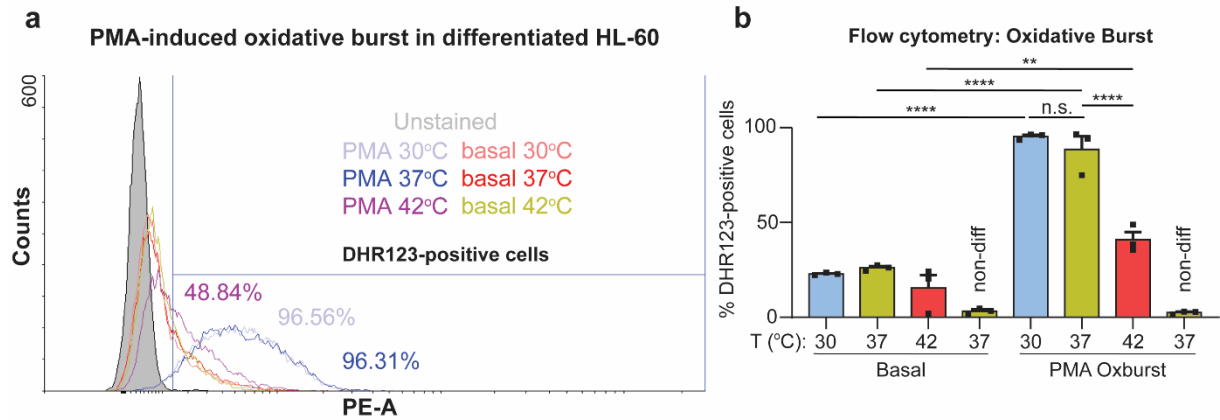

**Supplemental Figure 4: Oxidative burst in differentiated HL-60 cells as a function of temperature.**  
**a)** Flow cytometry of PMA-induced oxidative burst in differentiated and non-differentiated HL-60 cells.  
**b)** Quantitative analysis of the percentage of DHR123-positive cells with and without PMA induction.

**Supplemental Figure 5**

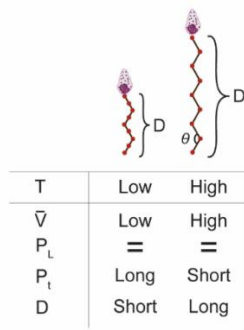

**Supplemental Figure 5: Higher speeds, lower persistence times, and equal persistence lengths allow cells to migrate more effectively at higher temperatures.** An illustration of cell tracks at low and high temperatures.  $\bar{V}$  is the average velocity,  $P_L$  is the persistence length,  $P_t$  is the persistence time and  $D$  is the length of the cell track. At low temperatures, cells have a long persistence time and short track lengths. At higher temperatures, cells have a short persistence time but long track lengths. As a result, persistence length stays the same at both low and high temperatures.
